# Supplementary material
Source: PubMed Central journal article supplement (PMC3669222)
Supplement: NIHMS443022-supplement-01.pdf [file NIHMS443022-supplement-01.pdf]

## Tables in online Appendix

Table V: Independent preoperative predictors for in-hospital, post discharge and 30-day death

|                                           | In-hospital |                   |                  | Post discharge |                  |                 | 30 – Day   |                   |                 |
|-------------------------------------------|-------------|-------------------|------------------|----------------|------------------|-----------------|------------|-------------------|-----------------|
|                                           | OR          | 95% CI            | P-value          | OR             | 95% CI           | P-value         | OR         | 95% CI            | P-value         |
| Female                                    | 1.1         | 0.8 – 1.6         | 0.7              | 1.2            | 0.8 – 1.7        | 0.3             | 1.1        | 0.9 – 1.5         | 0.3             |
| Age > 80 <sup>a</sup>                     | <b>2.5</b>  | <b>1.5 – 4.2</b>  | <b>&lt;.001</b>  | <b>2.4</b>     | <b>1.5 – 3.8</b> | <b>&lt;.001</b> | <b>2.4</b> | <b>1.7 – 3.5</b>  | <b>&lt;.001</b> |
| Hx of stroke/hemiplegia                   | <b>1.7</b>  | <b>1.1 – 2.5</b>  | <b>.01</b>       | <b>1.7</b>     | <b>1.2 – 2.5</b> | <b>&lt;.01</b>  | <b>1.7</b> | <b>1.3 – 2.2</b>  | <b>&lt;.001</b> |
| Hx of Angina/MI                           | <b>2.8</b>  | <b>1.6 – 4.7</b>  | <b>&lt;.001</b>  | 1.1            | 0.5 – 2.2        | 0.8             | <b>1.9</b> | <b>1.2 – 2.9</b>  | <b>&lt;.01</b>  |
| Renal failure                             | <b>5.7</b>  | <b>3.1 – 10.3</b> | <b>&lt;.001</b>  | <b>3.0</b>     | <b>1.4 – 6.4</b> | <b>&lt;.01</b>  | <b>4.3</b> | <b>2.7 – 6.9</b>  | <b>&lt;.001</b> |
| Hx of CHF                                 | 1.7         | 0.8 – 3.6         | 0.2              | 2.0            | 0.9 – 4.5        | 0.1             | <b>1.9</b> | <b>1.02 – 3.2</b> | <b>0.04</b>     |
| Dyspneu                                   | 1.3         | 0.9 – 2.1         | 0.2              | <b>1.7</b>     | <b>1.1 – 2.5</b> | <b>&lt;.01</b>  | <b>1.5</b> | <b>1.2 – 2.0</b>  | <b>&lt;.01</b>  |
| Hx of COPD                                | 1.4         | 0.9 – 2.3         | 0.1              | <b>2.5</b>     | <b>1.6 – 3.7</b> | <b>&lt;.001</b> | <b>1.9</b> | <b>1.4 – 2.6</b>  | <b>&lt;.001</b> |
| Hx of PVD                                 | <b>1.9</b>  | <b>1.1 – 3.0</b>  | <b>.01</b>       | <b>1.8</b>     | <b>1.2 – 2.8</b> | <b>.01</b>      | <b>1.8</b> | <b>1.3 – 2.5</b>  | <b>&lt;.001</b> |
| Functional status, dependent <sup>b</sup> | <b>3.6</b>  | <b>2.4 – 5.6</b>  | <b>&lt;.001</b>  | <b>2.0</b>     | <b>1.2 – 3.3</b> | <b>&lt;.01</b>  | <b>2.8</b> | <b>2.0 – 3.8</b>  | <b>&lt;.001</b> |
| Emergency procedure                       | <b>5.4</b>  | <b>3.0 – 9.5</b>  | <b>&lt;.001</b>  | 0.4            | 0.1 – 2.5        | 0.3             | <b>2.9</b> | <b>1.7 – 4.8</b>  | <b>&lt;.001</b> |
| ASA class > 3                             | <b>2.8</b>  | <b>1.8 – 4.1</b>  | <b>&lt;.0001</b> | <b>1.4</b>     | <b>0.9 – 2.1</b> | <b>&lt;.01</b>  | <b>1.9</b> | <b>1.4 – 2.5</b>  | <b>&lt;.001</b> |

OR, Odds Ratio, CI, Confidence Interval, Hx, history, MI, myocardial infarction, CHF, congestive heart failure,

COPD, chronic obstructive pulmonary disease, PVD, peripheral vascular disease, ASA, American Society of

Anesthesiology<sup>a</sup> vs. 60-70 yr<sup>b</sup> vs. independent

Table VI: Independent preoperative predictors for in-hospital, post discharge and 30-day cardiac events

|                             | Inhospital |                   |                 | postdischarge |                   |                 | 30 – Day   |                  |                 |
|-----------------------------|------------|-------------------|-----------------|---------------|-------------------|-----------------|------------|------------------|-----------------|
|                             | OR         | 95% CI            | P-value         | OR            | 95% CI            | P-value         | OR         | 95% CI           | P-value         |
| Female                      | 1.1        | 0.8 – 1.4         | 0.5             | 0.9           | 0.6 – 1.4         | 0.7             | 1.0        | 0.8 – 1.3        | 0.7             |
| Race non-white <sup>a</sup> | <b>1.6</b> | <b>1.1 – 2.4</b>  | <b>0.01</b>     | 1.2           | 0.6 – 2.2         | 0.6             | <b>1.5</b> | <b>1.1 – 2.1</b> | <b>0.02</b>     |
| Age > 80 <sup>b</sup>       | <b>2.7</b> | <b>1.8 – 3.8</b>  | <b>&lt;.001</b> | <b>2.0</b>    | <b>1.2 – 3.3</b>  | <b>&lt;.01</b>  | <b>2.4</b> | <b>1.8 – 3.3</b> | <b>&lt;.001</b> |
| Hx of stroke/hemiplegia     | <b>1.5</b> | <b>1.1 – 2.0</b>  | <b>&lt;.01</b>  | 1.2           | 0.8 – 1.8         | 0.3             | <b>1.4</b> | <b>1.1 – 1.8</b> | <b>&lt;.01</b>  |
| Hx of angina/MI             | <b>3.4</b> | <b>2.3 – 5.0</b>  | <b>&lt;.001</b> | 1.9           | 0.9 – 3.6         | 0.07            | <b>2.8</b> | <b>2.0 – 4.0</b> | <b>&lt;.001</b> |
| Diabetes                    | <b>1.7</b> | <b>1.3 – 2.3</b>  | <b>&lt;.001</b> | 1.2           | 0.8 – 1.8         | 0.4             | <b>1.5</b> | <b>1.2 – 1.9</b> | <b>&lt;.001</b> |
| Renal failure               | <b>2.1</b> | <b>1.1 – 4.1</b>  | <b>0.03</b>     | <b>2.7</b>    | <b>1.2 – 6.4</b>  | <b>0.02</b>     | <b>2.3</b> | <b>1.3 – 3.9</b> | <b>&lt;.01</b>  |
| Dyspnea                     | <b>1.4</b> | <b>1.04 – 1.9</b> | <b>0.02</b>     | <b>1.6</b>    | <b>1.02 – 2.4</b> | <b>0.04</b>     | <b>1.5</b> | <b>1.1 – 1.9</b> | <b>&lt;.01</b>  |
| Hx of PVD                   | <b>1.8</b> | <b>1.3 – 2.5</b>  | <b>&lt;.01</b>  | 1.6           | 0.97 – 2.7        | 0.07            | <b>1.7</b> | <b>1.3 – 2.3</b> | <b>&lt;.001</b> |
| ASA > 3                     | <b>1.6</b> | <b>1.2 – 2.2</b>  | <b>&lt;.01</b>  | <b>2.2</b>    | <b>1.4 – 3.3</b>  | <b>&lt;.001</b> | <b>1.8</b> | <b>1.4 – 2.3</b> | <b>&lt;.001</b> |
| Emergency                   | <b>2.5</b> | <b>1.4 – 4.7</b>  | <b>&lt;.01</b>  | 0.9           | 0.2 – 3.7         | 0.9             | <b>2.0</b> | <b>1.1 – 3.5</b> | <b>0.02</b>     |

Adjusted for gender. OR, Odds Ratio, CI, Confidence Interval, Hx, history, MI, myocardial infarction, PVD, peripheral vascular disease, ASA, American Society of Anesthesiology<sup>a</sup> vs. white<sup>b</sup> vs. 60-70 yr

Table VII: Independent preoperative predictors for in-hospital, post discharge and 30-day stroke, death or cardiac events

|                                           | In-hospital |                   |                 | Post Discharge |                   |                 | 30 – Day   |                   |                 |
|-------------------------------------------|-------------|-------------------|-----------------|----------------|-------------------|-----------------|------------|-------------------|-----------------|
|                                           | OR          | 95% CI            | P-value         | OR             | 95% CI            | P-value         | OR         | 95% CI            | P-value         |
| Female                                    | 1.1         | 0.9 – 1.3         | 0.2             | 1.2            | 0.97 – 1.5        | 0.08            | <b>1.1</b> | <b>1.01 – 1.3</b> | <b>0.05</b>     |
| Age > 80 <sup>a</sup>                     | <b>1.7</b>  | <b>1.3 – 2.1</b>  | <b>&lt;.001</b> | <b>1.6</b>     | <b>1.2 – 2.1</b>  | <b>&lt;.01</b>  | <b>1.6</b> | <b>1.4 – 2.0</b>  | <b>&lt;.001</b> |
| Redo CEA                                  | <b>3.2</b>  | <b>1.3 – 8.0</b>  | <b>.02</b>      | 1.2            | 0.2 – 8.5         | 0.9             | <b>2.4</b> | <b>1.04 – 5.7</b> | <b>0.04</b>     |
| Hx of stroke/hemiplegia                   | <b>1.7</b>  | <b>1.4 – 2.0</b>  | <b>&lt;.001</b> | <b>1.7</b>     | <b>1.4 – 2.2</b>  | <b>&lt;.001</b> | <b>1.7</b> | <b>1.5 – 1.9</b>  | <b>&lt;.001</b> |
| Hx of TIA                                 | 1.2         | 0.9 – 1.4         | 0.06            | <b>1.3</b>     | <b>1.01 – 1.6</b> | <b>0.04</b>     | <b>1.2</b> | <b>1.1 – 1.4</b>  | <b>&lt;.01</b>  |
| Diabetes                                  | <b>1.2</b>  | <b>1.03 – 1.4</b> | <b>0.02</b>     | 1.0            | 0.8 – 1.3         | 0.7             | <b>1.2</b> | <b>1.01 – 1.3</b> | <b>0.04</b>     |
| Hx of angina/MI                           | <b>2.3</b>  | <b>1.8 – 3.0</b>  | <b>&lt;.001</b> | <b>1.7</b>     | <b>1.2 – 2.6</b>  | <b>&lt;.01</b>  | <b>2.1</b> | <b>1.7 – 2.6</b>  | <b>&lt;.001</b> |
| Renal failure                             | <b>1.8</b>  | <b>1.2 – 2.9</b>  | <b>&lt;.01</b>  | <b>3.0</b>     | <b>1.8 – 5.0</b>  | <b>&lt;.001</b> | <b>2.5</b> | <b>1.7 – 3.6</b>  | <b>&lt;.001</b> |
| Hx of COPD                                | 1.1         | 0.9 – 1.4         | 0.4             | <b>1.8</b>     | <b>1.4 – 2.3</b>  | <b>&lt;.001</b> | <b>1.3</b> | <b>1.1 – 1.6</b>  | <b>&lt;.01</b>  |
| Hx of PVD                                 | <b>1.5</b>  | <b>1.2 – 1.9</b>  | <b>&lt;.01</b>  | 1.3            | 0.98 – 1.8        | 0.06            | <b>1.4</b> | <b>1.2 – 1.7</b>  | <b>&lt;.001</b> |
| Functional status, dependent <sup>b</sup> | <b>1.9</b>  | <b>1.5 – 2.4</b>  | <b>&lt;.001</b> | <b>1.6</b>     | <b>1.1 – 2.2</b>  | <b>&lt;.01</b>  | <b>1.8</b> | <b>1.3 – 2.5</b>  | <b>&lt;.001</b> |
| Emergency procedure                       | <b>2.5</b>  | <b>1.8 – 3.6</b>  | <b>&lt;.001</b> | 0.6            | 0.2 – 1.5         | 0.3             | <b>1.8</b> | <b>1.3 – 2.5</b>  | <b>&lt;.001</b> |
| ASA class > 3                             | <b>1.5</b>  | <b>1.3 – 1.9</b>  | <b>&lt;.001</b> | <b>1.5</b>     | <b>1.2 – 1.9</b>  | <b>&lt;.01</b>  | <b>1.5</b> | <b>1.3 – 1.8</b>  | <b>&lt;.001</b> |

OR, Odds Ratio, CI, Confidence Interval, CEA, carotid endarterectomy, Hx, history, TIA, transient ischemic attack, MI, myocardial infarction, COPD, chronic obstructive pulmonary disease, PVD, peripheral vascular disease, ASA, American Society of Anesthesiology <sup>a</sup> vs. 60-70 yr <sup>b</sup> vs. independent

Table VIII: Cumulative risk for stroke and stroke or death in the high risk groups (female gender, renal failure and COPD)\* for post discharge events

| # of risk factors | Stroke      |                |        | Stroke/Death |                |        |
|-------------------|-------------|----------------|--------|--------------|----------------|--------|
|                   | In-hospital | Post Discharge | 30-Day | In-hospital  | Post Discharge | 30-Day |
| 0                 | 1.0%        | 0.4%           | 1.4%   | 1.2%         | 0.7%           | 1.8%   |
| 1                 | 1.2%        | 0.7%           | 1.9%   | 1.5%         | 1.1%           | 2.6%   |
| 2                 | 0%          | 2.5%           | 2.5%   | 3.5%         | 5.0%           | 8.5%   |
| 3 <sup>a</sup>    | 0%          | 0%             | 0%     | 4.3%         | 4.3%           | 8.7%   |

\*High risk group based on the independent predictors identified for post discharge events by multivariable models. <sup>a</sup> 23 patients with all three risk factors present
